# Supplementary material for: Rapid in situ forming PEG hydrogels for mucosal drug delivery
Source: Royal Society of Chemistry journal article supplement (doi:10.1039/d4bm01101e), 2025-01-01
Supplement: d4bm01101e1.xlsx [file d4bm01101e1.xlsx]

## Sheet: Fig. 2A
Rapid in situ forming PEG hydrogels for mucosal drug delivery
Taj Yeruva1*, Robert J. Morris III2, Sahana Kumar1,3, Luke Zhao1, Peter Kofinas2, Gregg A. Duncan1,3*
1Fischell Department of Bioengineering, University of Maryland, College Park, MD 20742, USA
2Department of Chemical & Biomolecular Engineering, University of Maryland, College Park, MD 20742, USA
3Molecular and Cellular Biology Program, University of Maryland, College Park, MD 20742, USA
*Correspondence to: Gregg Duncan, email: gaduncan@umd.edu; Taj Yeruva, email: tyeruva@umd.edu
Figure 2. Physical characterization of rapid in situ forming PEG gels
Storage Modulus (G', Pa) at a frequency 10 rad/sec
1% 4-arm PEG-Thiol 10kD 1.5% 4-arm PEG-OPSS 10kD			1% 4-arm PEG-Thiol 20kD 1.5% 4-arm PEG-OPSS 20kD			1% 4-arm PEG-Thiol 10kD 2% 4-arm PEG-OPSS 10kD			1% 4-arm PEG-Thiol 20kD 2% 4-arm PEG-OPSS 20kD			2% 4-arm PEG-Thiol 10kD 2% 4-arm PEG-OPSS 10kD			2% 4-arm PEG-Thiol 20kD 2% 4-arm PEG-OPSS 20kD
478.386			685.745			560.683			787.266			542.307			1838.09
461.631			423.725			371.126			676.83			500.625			1892.29
441.195			459.532			662.771			569.373			585.825			1404.26

## Sheet: Fig. 2B
Rapid in situ forming PEG hydrogels for mucosal drug delivery
Taj Yeruva1*, Robert J. Morris III2, Sahana Kumar1,3, Luke Zhao1, Peter Kofinas2, Gregg A. Duncan1,3*
1Fischell Department of Bioengineering, University of Maryland, College Park, MD 20742, USA
2Department of Chemical & Biomolecular Engineering, University of Maryland, College Park, MD 20742, USA
3Molecular and Cellular Biology Program, University of Maryland, College Park, MD 20742, USA
*Correspondence to: Gregg Duncan, email: gaduncan@umd.edu; Taj Yeruva, email: tyeruva@umd.edu
Figure 2. Physical characterization of rapid in situ forming PEG gels
Pore Size ξ (nm)
1% 4-arm PEG-Thiol 10kD 1.5% 4-arm PEG-OPSS 10kD			1% 4-arm PEG-Thiol 20kD 1.5% 4-arm PEG-OPSS 20kD			1% 4-arm PEG-Thiol 10kD 2% 4-arm PEG-OPSS 10kD			1% 4-arm PEG-Thiol 20kD 2% 4-arm PEG-OPSS 20kD			2% 4-arm PEG-Thiol 10kD 2% 4-arm PEG-OPSS 10kD			2% 4-arm PEG-Thiol 20kD 2% 4-arm PEG-OPSS 20kD
110.336			313.546			86.8987			91.6781			116.01			92.2321
223.785			48.8569			136.495			83.2528			107.758			86.5061
112.752			463.333			136.124			98.1419			134.053			91.236
549.865			499.819			918.777			145.942			114.788			119.28
116.424			640.421			81.0094			99.018			200.536			92.2321
93.0951			646.353			129.899			264.131			58.6024			86.5061
136.47			313.546			776.222			561.944			120.075			91.236
93.0379			48.8569			758.771			281.774			115.833			119.28
89.3794			463.333						382.716			140.377			177.856
80.6607			499.819			1238.06			547.782			255.737			76.3893
284.372			640.421			854.867			273.088			111.778			125.759
289.126			646.353			701.248			1160.8			125.023			82.3868
150.659			129.191			139.372			91.6781			113.391			312.09
134.575			101.651			896.382			83.2528			275.203			414.504
397.157			106.238			567.389			98.1419			116.01
225.989			87.4697			670.327			145.942			107.758			92.2321
778.658			77.8221			676.708			99.018			134.053			86.5061
87.1623			521.126			293.485			264.131			114.788			91.236
185.848			120.173			570.656			561.944			200.536			119.28
408.869			77.1494			140.31			281.774			58.6024			177.856
89.7874			82.0393			750.567			382.716			120.075			76.3893
93.1135			112.712			508.792			547.782			115.833			125.759
93.816			152.412			312.524			273.088			140.377			82.3868
135.891			294.046			740.781			1160.8			255.737			312.09
269.833			583.032			86.8987			91.6781			111.778			414.504
231.398			446.475			136.495			83.2528			125.023
157.945			1295.72			136.124			98.1419			113.391			130.429
136.073			575.821			918.777			145.942			275.203			300.782
80.3179			984.901			81.0094			99.018			119.719			83.2899
145.152			313.546			129.899			264.131			89.3135			95.048
85.492			48.8569			776.222			561.944			84.5307			123.648
321.054			463.333			758.771			281.774			141.611			86.8174
708.212			499.819						382.716			84.9851			223.872
805.877			640.421			1238.06			547.782			300.31			265.954
241.14			646.353			854.867			273.088			164.192			503.837
685.708			129.191			701.248			1160.8			79.4736			366.165
207.075			101.651			139.372			128.621			151.688			991.77
239.012			106.238			896.382			101.037			106.288			237.877
581.448			87.4697			567.389			92.1546			95.1204			1052.34
214.59			77.8221			670.327			99.5397			94.0475			841.268
928.769			521.126			676.708			94.1642			193.666			284.664
210.924			120.173			293.485			122.439			151.202			533.206
693.99			77.1494			570.656			163.808			121.872			206.692
695.319			82.0393			140.31			124.339			155.234			1280.39
137.531			112.712			750.567			154.266			311.383			618.417
599.443			152.412			508.792			146.082			197.971			230.182
150.471			294.046			312.524			91.6781			108.95			485.468
320.207			583.032			740.781			83.2528			211.588			279.973
815.513			446.475			84.297			98.1419			420.62			1234.65
1833.29			1295.72			106.202			145.942			329.225			929.843
82.3846			575.821			220.346			99.018			176.395			94.944
263.16			984.901			91.0396			264.131			83.3492			257.175
106.781			115.391			81.2145			561.944			123.141			1098.51
129.955			977.155			116.703			281.774			321.378			200.406
203.915			234.145			367.895			382.716			120.37			291.627
142.9			376.495			242.208			547.782			338.861			518.165
223.638			115.471			164.471			273.088			190.776			92.2321
264.876			244.315			708.084			1160.8			146.14			86.5061
1767.59			285.809			751.664			128.621			73.8876			91.236
1052.55			385.499			114.344			101.037			177.46			119.28
380.361			603.709			408.046			92.1546			384.271			177.856
1293.13			374.687			248.171			99.5397			78.7029			76.3893
8.43906			883.309			87.4006			94.1642			201.635			125.759
153.979			219.388			205.716			122.439			876.383			82.3868
1463.56			377.426			329.418			163.808			151.945			312.09
316.666			44.9731			347.457			124.339			8.18936			414.504
993.246			313.546			304.956			154.266			198.094
270.01			48.8569			733.209			146.082			89.1816			130.429
1318.2			463.333			335.76			97.1191			126.859			300.782
263.899			499.819			212.876			91.6781			304.632			83.2899
158.827			640.421			313.775			83.2528			320.841			95.048
921.106			646.353			96.1289			98.1419			73.251			123.648
717.878			129.191			81.7635			145.942			570.35			86.8174
1361.09			101.651			86.8987			99.018			116.01			223.872
184.567			106.238			136.495			264.131			107.758			265.954
135.199			87.4697			136.124			561.944			134.053			503.837
109.475			77.8221			918.777			281.774			114.788			366.165
145.276			521.126			81.0094			382.716			200.536			991.77
148.929			120.173			129.899			547.782			58.6024			237.877
100.385			77.1494			776.222			273.088			120.075			1052.34
148.748			82.0393			758.771			1160.8			115.833			841.268
86.7594			112.712						128.621			140.377			284.664
121.552			152.412			1238.06			101.037			255.737			533.206
91.4818			294.046			854.867			92.1546			111.778			206.692
178.128			583.032			701.248			99.5397			125.023			1280.39
186.6			446.475			139.372			94.1642			113.391			618.417
196.365			1295.72			896.382			122.439			275.203			230.182
92.2264			575.821			567.389			163.808			119.719			485.468
95.8193			984.901			670.327			124.339			89.3135			279.973
82.2745			115.391			676.708			154.266			84.5307			1234.65
102.922			977.155			293.485			146.082			141.611			929.843
121.717			234.145			570.656			97.1191			84.9851			94.944
13.8377			376.495			140.31			85.9795			300.31			257.175
233.84			115.471			750.567			83.2516			164.192			1098.51
100.621			244.315			508.792			82.8063			79.4736			200.406
163.126			285.809			312.524			85.0638			151.688			291.627
80.3234			385.499			740.781			85.5925			106.288			518.165
147.644			603.709			84.297			95.5236			95.1204			85.5104
162.719			374.687			106.202			115.815			94.0475			89.7387
181.566			883.309			220.346			115.693			193.666			99.2518
86.6473			219.388			91.0396			157.437			151.202			195.521
126.886			377.426			81.2145			87.6741			121.872			113.696
101.316			44.9731			116.703			95.5236			155.234			77.3759
85.0178			84.8384			367.895			115.815			311.383			83.38
208.594			124.063			242.208			115.693			197.971			88.4575
114.713			118.959			164.471			157.437			108.95			74.4425
185.588			506.533			708.084			87.6741			211.588			3063.86
110.761			864.772			751.664			100.159			420.62			198.11
95.907			447.686			114.344			117.22			329.225			763.774
97.588			471.144			408.046			163.844			176.395			564.896
105.534			313.546			248.171			93.5616			83.3492			189.216
129.637			48.8569			87.4006			388.3			123.141			1364.71
271.781			463.333			205.716			130.227			321.378			330.364
165.253			499.819			329.418						120.37			93.636
349.528			640.421			347.457			749.05			338.861
921.527			646.353			304.956			156.244			190.776			177.642
166.045			129.191			733.209			95.5236			146.14			92.2321
578.775			101.651			335.76			115.815			73.8876			86.5061
108.72			106.238			212.876			115.693			177.46			91.236
716.66			87.4697			313.775			157.437			384.271			119.28
108.385			77.8221			96.1289			87.6741			78.7029			177.856
108.945			521.126			81.7635			100.159			201.635			76.3893
127.697			120.173			142.212			117.22			876.383			125.759
123.482			77.1494			193.927			163.844			151.945			82.3868
			82.0393			162.649			93.5616			8.18936			312.09
226.68			112.712			191.31			388.3			198.094			414.504
351.157			152.412			168.011			130.227			89.1816
132.454			294.046			83.7383						126.859			130.429
572.01			583.032			154.338			749.05			304.632			300.782
191.317			446.475			162.875			156.244			320.841			83.2899
174.713			1295.72			103.42			131.73			73.251			95.048
184.636			575.821			577.659			109.452			570.35			123.648
130.062			984.901			16.7576			417.16			659.976			86.8174
99.5712			115.391			323.94			102.574			219.694			223.872
175.221			977.155			101.759			127.182			155.125			265.954
172.749			234.145			184.272			231.215			270.559			503.837
122.516			376.495			1468.43			201.773			98.5208			366.165
182.038			115.471			544.165			395.753			471.169			991.77
246.414			244.315			259.821			348.793			114.416			237.877
168.465			285.809			353.675			95.5236			106.011			1052.34
267.832			385.499			854.024			115.815			270.323			841.268
204.264			603.709			548.868			115.693			716.478			284.664
			374.687			382.059			157.437			291.146			533.206
506.518			883.309			336.822			87.6741			791.296			206.692
180.607			219.388			673.372			100.159			95.9009			1280.39
78.0865			377.426			86.8987			117.22			100.112			618.417
133.78			44.9731			136.495			163.844			914.098			230.182
105.57			84.8384			136.124			93.5616			765.572			485.468
86.6035			124.063			918.777			388.3			106.514			279.973
78.8797			118.959			81.0094			130.227			36.9102			1234.65
88.2852			506.533			129.899						119.598			929.843
214.779			864.772			776.222			749.05			874.525			94.944
79.1247			447.686			758.771			156.244			591.949			257.175
77.7866			471.144						131.73			1131.63			1098.51
93.6485			187.026			1238.06			109.452			251.466			200.406
80.1773			249.032			854.867			417.16			474.071			291.627
163.701			253.801			701.248			102.574			164.168			518.165
87.6612			298.669			139.372			127.182			607.026			85.5104
82.5398			253.416			896.382			231.215			96.8329			89.7387
334.84			594.967			567.389			201.773			283.291			99.2518
175.135			451.515			670.327			395.753			540.936			195.521
157.01			300.639			676.708			348.793			56.6476			113.696
549.057			435.196			293.485			175.253			255.6			77.3759
228.011			208.399			570.656			222.461			101.67			83.38
90.1407			460.235			140.31			172.749			90.8287			88.4575
94.0013			175.135			750.567			122.177			281.44			74.4425
211.356			224.067			508.792			248.566			97.6141			3063.86
245.147			173.92			312.524			120.039			2117.96			198.11
123.741			198.221			740.781			227.513			140.378			763.774
95.2658			154.737			84.297			169.271			116.01			564.896
119.469			227.173			106.202			170.319			107.758			189.216
105.69			175.135			220.346			242.621			134.053			1364.71
105.917			224.067			91.0396			182.258			114.788			330.364
109.267			173.92			81.2145			95.5236			200.536			93.636
111.035			198.221			116.703			115.815			58.6024
110.781			154.737			367.895			115.693			120.075			177.642
309.621			227.173			242.208			157.437			115.833			102.847
302.15			164.238			164.471			87.6741			140.377			321.942
117.028			96.7708			708.084			100.159			255.737			197.715
121.154			124.785			751.664			117.22			111.778			76.6925
168.436			95.9176			114.344			163.844			125.023			149.145
132.253			115.148			408.046			93.5616			113.391			167.877
152.491			182.55			248.171			388.3			275.203			109.306
107.963			208.723			87.4006			130.227			119.719			171.23
124.28			117.448			205.716						89.3135			100.011
81.8592			65.0845			329.418			749.05			84.5307			91.9145
152.695			138.905			347.457			156.244			141.611			131.531
241.164			403.539			304.956			131.73			84.9851			336.987
306.65			201.244			733.209			109.452			300.31			416.478
654.605			392.151			335.76			417.16			164.192
254.487			285.765			212.876			102.574			79.4736			106.741
166.625			220.509			313.775			127.182			151.688			344.958
279.737			321.847			96.1289			231.215			106.288			419.603
1318.77						81.7635			201.773			95.1204			505.589
330.443			1553.2			142.212			395.753			94.0475			374.194
163.083			378.031			193.927			348.793			193.666			201.59
906.038			199.164			162.649			175.253			151.202
			175.135			191.31			222.461			121.872			296.273
253.722			224.067			168.011			172.749			155.234			591.156
276.216			173.92			83.7383			122.177			311.383			177.351
167.265			198.221			154.338			248.566			197.971			92.0495
209.871			154.737			162.875			120.039			108.95			364.006
291.55			227.173			103.42			227.513			211.588			98.6211
1009.15			164.238			577.659			169.271			420.62			179.582
112.452			96.7708			16.7576			170.319			329.225			323.039
159.01			124.785			323.94			242.621			176.395			95.6772
950.435			95.9176			101.759			182.258			83.3492			335.47
405.39			115.148			184.272			92.8659			123.141			199.785
70.4378			182.55			1468.43			104.865			321.378			177.351
224.018			208.723			544.165			88.9395			120.37			92.0495
157.778			117.448			259.821			545.599			338.861			364.006
161.585			65.0845			353.675			255.987			190.776			98.6211
117.487			138.905			854.024			742.228			146.14			179.582
153.086			403.539			548.868			698.323			73.8876			323.039
110.634			201.244			382.059			57.6931			177.46			95.6772
86.7959			392.151			336.822			328.723			384.271			335.47
141.683			285.765			673.372			284.915			78.7029			199.785
181.113			220.509			114.096			292.805			201.635			107.805
142.899			321.847			91.6573			523.509			876.383			78.4807
176.858						272.061			496.612			151.945			78.6378
160.293			1553.2			99.5075			856.348			8.18936			128.692
228.612			378.031			158.453			155.168			198.094			122.058
117.412			199.164			244.638			117.462			89.1816			77.6271
150.755			138.121			171.72			124.894			126.859			114.088
114.994			545.79			167.565			159.754			304.632			177.351
136.79			126.939			102.962			155.168			320.841			92.0495
152.334			152.541			144.579			117.462			73.251			364.006
125.655			305.897			140.491			124.894			570.35			98.6211
167.222			102.892			82.1924			159.754			659.976			179.582
119.004			129.181			448.766			88.235			219.694			323.039
298.814			184.783			628.583			165.708			155.125			95.6772
227.964			139.721			14.5333			233.158			270.559			335.47
376.948			162.061			213.452			83.2624			98.5208			199.785
95.8743			112.338			176.892			168.335			471.169			107.805
244.418						358.823			88.3244			114.416			78.4807
220.397			297.477			437.798			86.6715			106.011			78.6378
256.577			157.184			190.574			261.193			270.323			128.692
109.341			404.438			159.883			166.793			716.478			122.058
119.472			15.9096			202.81			238.365			291.146			77.6271
81.7992			265.154			604.685			264.802			791.296			114.088
233.888			359.53			218.493			155.168			95.9009			175.552
145.603			330.916			180.985			117.462			100.112			82.1426
89.5346			363.11			465.871			124.894			914.098			92.1511
237.93			1178.17			86.8987			159.754			765.572			88.1624
105.733			355.7			136.495			88.235			106.514			324.485
98.1895			277.971			136.124			165.708			36.9102			314.064
101.868			360.416			918.777			233.158			119.598			166.587
3.07708						81.0094			83.2624			874.525			177.351
85.9976			374.889			129.899			168.335			591.949			92.0495
147.723			243.289			776.222			88.3244			1131.63			364.006
304.363			275.795			758.771			86.6715			251.466			98.6211
			1290.55						261.193			474.071			179.582
299.941			306.058			1238.06			166.793			164.168			323.039
142.947			396.468			854.867			238.365			607.026			95.6772
224.231			368.469			701.248			264.802			96.8329			335.47
136.333			954.221			139.372			92.7635			283.291			199.785
130.727			367.808			896.382			86.4891			540.936			107.805
336.718			65.6566			567.389			102.751			56.6476			78.4807
242.314			175.135			670.327			107.066			255.6			78.6378
265.803			224.067			676.708			475.169			101.67			128.692
124.199			173.92			293.485						90.8287			122.058
111.246			198.221			570.656			300.238			281.44			77.6271
257.457			154.737			140.31			438.892			97.6141			114.088
98.9204			227.173			750.567			347.173			2117.96			175.552
118.947			164.238			508.792			155.168			140.378			82.1426
159.415			96.7708			312.524			117.462			78.7807			92.1511
161.942			124.785			740.781			124.894			272.866			88.1624
189.773			95.9176			84.297			159.754			107.884			324.485
118.226			115.148			106.202			88.235			113.199			314.064
77.4825			182.55			220.346			165.708			143			166.587
101.533			208.723			91.0396			233.158			84.2004			85.3576
78.9116			117.448			81.2145			83.2624			80.2364			140.88
163.858			65.0845			116.703			168.335			98.9109			1095.31
82.4638			138.905			367.895			88.3244			138.842			382.009
79.4257			403.539			242.208			86.6715			85.4713			88.2245
90.3756			201.244			164.471			261.193			87.535			576.703
307.76			392.151			708.084			166.793			186.742
160.869			285.765			751.664			238.365			96.5815			177.351
300.089			220.509			114.344			264.802			526.788			92.0495
			321.847			408.046			92.7635			299.236			364.006
164.717						248.171			86.4891			598.972			98.6211
685.3			1553.2			87.4006			102.751			242.27			179.582
226.807			378.031			205.716			107.066			265.433			323.039
244.556			199.164			329.418			475.169			1127.66			95.6772
29.007			138.121			347.457						739.897			335.47
169.188			545.79			304.956			300.238			362.599			199.785
397.461			126.939			733.209			438.892			122.54			107.805
233.21			152.541			335.76			347.173			111.183			78.4807
173.99			305.897			212.876			96.557			414.37			78.6378
194.971			102.892			313.775			113.384			393.148			128.692
173			129.181			96.1289			172.522			237.681			122.058
199.011			184.783			81.7635			107.12			108.311			77.6271
333.626			139.721			142.212			151.355			1093.54			114.088
666.28			162.061			193.927			127.824			356.755			175.552
114.922			112.338			162.649			182.997			144.713			82.1426
135.611						191.31			155.168			716.419			92.1511
435.852			297.477			168.011			117.462			103.047			88.1624
385.044			157.184			83.7383			124.894			199.191			324.485
271.62			404.438			154.338			159.754			290.634			314.064
5.71405			15.9096			162.875			88.235			308.827			166.587
89.0438			265.154			103.42			165.708			641.468			85.3576
349.803			359.53			577.659			233.158			1.97189			140.88
333.515			330.916			16.7576			83.2624			181.827			1095.31
98.4468			363.11			323.94			168.335			780.702			382.009
366.166			1178.17			101.759			88.3244			348.757			88.2245
30.3887			355.7			184.272			86.6715			113.683			576.703
424.916			277.971			1468.43			261.193			483.055
187.625			360.416			544.165			166.793			204.233			107.999
226.895						259.821			238.365			846.677			77.6925
			374.889			353.675			264.802			106.881			120.289
			243.289			854.024			92.7635			89.1536			452.845
209.459			275.795			548.868			86.4891			304.783			631.789
282.737			1290.55			382.059			102.751			249.622			98.5373
316.043			306.058			336.822			107.066			116.01			96.7805
183.25			396.468			673.372			475.169			107.758			251.655
475.158			368.469			114.096						134.053			102.526
60.4903			954.221			91.6573			300.238			114.788			306.976
656.965			367.808			272.061			438.892			200.536			189.199
601.722			65.6566			99.5075			347.173			58.6024			256.036
741.072			85.3749			158.453			96.557			120.075			257.439
213.282			97.1472			244.638			113.384			115.833			259.275
174.106			345.279			171.72			172.522			140.377			6.03444
222.244			139.603			167.565			107.12			255.737			245.389
			94.0606			102.962			151.355			111.778			225.262
			266.016			144.579			127.824			125.023			98.5373
96.2814			310.461			140.491			182.997			113.391			96.7805
142.621			265.369			82.1924			94.5037			275.203			251.655
197.455			331.652			448.766			94.1964			119.719			102.526
132.143			86.9732			628.583			99.0514			89.3135			306.976
142.324			444.569			14.5333			402.37			84.5307			189.199
101.758			368.301			213.452			383.975			141.611			256.036
148.43			85.4325			176.892						84.9851			257.439
120.392			175.135			358.823						300.31			259.275
138.925			224.067			437.798						164.192			6.03444
157.043			173.92			190.574						79.4736			245.389
174.383			198.221			159.883						151.688			225.262
282.787			154.737			202.81						106.288			362.651
94.8092			227.173			604.685						95.1204			102.508
138.664			164.238			218.493						94.0475			151.553
140.257			96.7708			180.985						193.666			92.7309
122.385			124.785			465.871						151.202			77.7091
80.1192			95.9176			228.049						121.872			95.2785
136.822			115.148			157.715						155.234			104.711
189.916			182.55			136.624						311.383			326.957
281.999			208.723			171.442						197.971			337.947
81.0316			117.448			375.507						108.95			98.5373
82.4094			65.0845			157.99						211.588			96.7805
88.8667			138.905			164.237						420.62			251.655
476.946			403.539			184.561						329.225			102.526
176.483			201.244			193.833						176.395			306.976
330.932			392.151			153.86						83.3492			189.199
236.628			285.765			236.565						123.141			256.036
229.205			220.509			194.509						321.378			257.439
183.248			321.847			198.032						120.37			259.275
179.34						116.51						338.861			6.03444
445.424			1553.2			246.582						190.776			245.389
838.058			378.031			286.283						146.14			225.262
149.075			199.164			144.269						73.8876			362.651
326.505			138.121			337.558						177.46			102.508
287.231			545.79			446.957						384.271			151.553
197.475			126.939			407.161						78.7029			92.7309
462.058			152.541			366.798						201.635			77.7091
228.918			305.897			653.206						876.383			95.2785
172.567			102.892			210.895						151.945			104.711
206.586			129.181			232.104						8.18936			326.957
242.558			184.783			400.798						198.094			337.947
269.51			139.721			135.961						89.1816			89.6098
89.8653			162.061			866.781						126.859			153.765
99.2734			112.338			350.921						304.632			426.084
6.85971						553.105						320.841			125.861
143.953			297.477			520.148						73.251			457.679
201.209			157.184			105.051						570.35			92.9754
99.4237			404.438			113.712						659.976			532.075
116.454			15.9096			101.854						219.694			525.125
106.333			265.154			120.14						155.125			500.356
82.5351			359.53			175.42						270.559			111.702
108.559			330.916			237.894						98.5208			130.305
115.041			363.11			97.2838						471.169			88.8486
131.822			1178.17			111.485						114.416			301.977
98.0165			355.7			159.054						106.011			510.884
170.679			277.971			404.745						270.323			98.4721
140.648			360.416			83.3815						716.478			465.392
285.492						141.441						291.146			307.53
114.949			374.889			121.347						791.296			392.161
114.083			243.289			593.069						95.9009			478.042
149.293			275.795			1148.15						100.112			222.465
102.22			1290.55			976.21						914.098			154.838
			306.058			195.014						765.572			98.646
74.8786			396.468									106.514			101.155
164.035			368.469			678.399						36.9102			86.7074
173.45			954.221			721.226						119.598			380.384
230.766			367.808			679.626						874.525			337.882
125.517			65.6566			208.851						591.949			351.568
106.193			85.3749			200.87						1131.63
233.837			97.1472			126.335						251.466
149.82			345.279			810.037						474.071
299.396			139.603			126.148						164.168
205.919			94.0606			573.068						607.026
8.89801			266.016			106.637						96.8329
174.464			310.461			853.351						283.291
421.369			265.369			109.954						540.936
161.266			331.652			555.167						56.6476
448.41			86.9732			921.141						255.6
221.796			444.569			140.615						101.67
423.024			368.301			106.564						90.8287
575.124			85.4325			155.382						281.44
183.594			272.848			523.019						97.6141
260.464			85.627			1090.43						2117.96
375.609			82.9991			785.51						140.378
412.314			137.232			1111.18						78.7807
226.129			180.387			677.494						272.866
171.459			83.3318			625.153						107.884
301.091			361.942			237						113.199
259.118			449.503			105.051						143
183.242			125.05			113.712						84.2004
165.109			215.157			101.854						80.2364
364.2			457.878			120.14						98.9109
180.143			616.914			175.42						138.842
223.618			104.193			237.894						85.4713
192.926			248.746			97.2838						87.535
193.816			78.0043			111.485						186.742
120.691			104.193			159.054						96.5815
142.081			248.746			404.745						526.788
277.597			78.0043			83.3815						299.236
152.707			168.702			141.441						598.972
117.305			78.5986			121.347						242.27
184.745			105.122			593.069						265.433
83.2102			123.244			1148.15						1127.66
150.891			100.74			976.21						739.897
138.859			681.906			195.014						362.599
99.2952			399.824									122.54
131.293			667.476			678.399						111.183
183.305			125.099			721.226						414.37
305.756			307.671			679.626						393.148
136.68			1606.51			208.851						237.681
175.75			329.444			200.87						108.311
162.319			780.197			126.335						1093.54
170.982			345.156			810.037						356.755
322.587			114.201			126.148						144.713
347.111			340.815			573.068						716.419
464.231			104.193			106.637						103.047
397.151			248.746			853.351						199.191
315.092			78.0043			109.954						290.634
292.586			168.702			555.167						308.827
			78.5986			921.141						641.468
284.883			105.122			140.615						1.97189
189.819			123.244			106.564						181.827
574.114			100.74			155.382						780.702
412.046			681.906			523.019						348.757
323.472			399.824			1090.43						113.683
178.446			667.476			785.51						483.055
343.733			125.099			1111.18						204.233
216.757			307.671			677.494						846.677
521.989			1606.51			625.153						106.881
193.277			329.444			237						89.1536
299.222			780.197			146.466						304.783
323.681			345.156			194.206						249.622
510.597			114.201			137.426						131.335
506.203			340.815			176.564						81.312
149.074			102.097			125.57						608.587
109.931			80.3548			175.358						202.8
152.37			204.801			114.743						77.4119
99.0702			288.075			140.499						226.264
109.008			118.529			145.47						78.0887
141.307			202.433			159.042						112.049
519.504			273.08			136.889						81.7355
113.838			255.493			93.9041						136.14
134.449			177.631			200.264						207.953
117.07			104.193			738.948						90.9509
167.783			248.746			146.845						491.176
147.838			78.0043			867.713						99.1691
81.5587			168.702			118.712
110.902			78.5986			140.201						969.843
174.985			105.122			168.468						121.813
106.551			123.244			903.153						708.852
107.719			100.74			148.255						468.901
133.873			681.906			137.075						303.762
218.316			399.824			1162.4						85.1038
126.827			667.476			105.051
127.563			125.099			113.712						89.9573
204.015			307.671			101.854						697.322
126.634			1606.51			120.14						327.782
130.499			329.444			175.42						133.49
130.611			780.197			237.894						552.302
282.396			345.156			97.2838						97.8684
224.927			114.201			111.485						320.563
204.845			340.815			159.054						99.7434
62.4158			102.097			404.745						303.887
369.018			80.3548			83.3815						99.5473
181.068			204.801			141.441						97.3779
638.504			288.075			121.347						140.73
492.4			118.529			593.069						219.127
132.914			202.433			1148.15						243.199
269.49			273.08			976.21						205.972
709.465			255.493			195.014						384.808
170.836			177.631									267.167
317.867			140.108			678.399						259.163
292.586			248.596			721.226						145.72
155.244			150.532			679.626						211.885
389.74			293.354			208.851						97.8684
151.339			214.653			200.87						320.563
625.149			226.509			126.335						99.7434
377.906			566.221			810.037						303.887
228.798			308.332			126.148						99.5473
			305.022			573.068						97.3779
			104.193			106.637						140.73
			248.746			853.351						219.127
			78.0043			109.954						243.199
			168.702			555.167						205.972
			78.5986			921.141						384.808
			105.122			140.615						267.167
			123.244			106.564						259.163
			100.74			155.382						145.72
			681.906			523.019						211.885
			399.824			1090.43						80.3979
			667.476			785.51						96.8668
			125.099			1111.18						95.2067
			307.671			677.494						252.559
			1606.51			625.153						256.646
			329.444			237						394.852
			780.197			146.466						60.9336
			345.156			194.206						21.3223
			114.201			137.426						614.308
			340.815			176.564						120.946
			102.097			125.57						382.724
			80.3548			175.358						350.699
			204.801			114.743						253.022
			288.075			140.499						1130.74
			118.529			145.47
			202.433			159.042						844.508
			273.08			136.889						602.335
			255.493			93.9041						96.4669
			177.631			200.264						570.572
			140.108			738.948						508.171
			248.596			146.845						241.652
			150.532			867.713						97.8684
			293.354			118.712						320.563
			214.653			140.201						99.7434
			226.509			168.468						303.887
			566.221			903.153						99.5473
			308.332			148.255						97.3779
			305.022			137.075						140.73
			112.567			1162.4						219.127
			114.951			85.5271						243.199
			119.652			91.5027						205.972
			482.117			115.863						384.808
			80.262			494.474						267.167
			630.005			314.218						259.163
			407.558			531.233						145.72
			347.28			148.38						211.885
						101.229						80.3979
						460.732						96.8668
						181.927						95.2067
						86.2368						252.559
						108.942						256.646
						633.178						394.852
						443.07						60.9336
						890.798						21.3223
						183.492						614.308
						270.341						120.946
						779.898						382.724
						788.331						350.699
						99.5862						253.022
						360.85						1130.74
						18.5789
						347.467						844.508
						183.878						602.335
						528.009						96.4669
						112.233						570.572
						931.341						508.171
						105.051						241.652
						113.712						157.644
						101.854						629.518
						120.14						236.504
						175.42						303.088
						237.894						401.67
						97.2838						171.511
						111.485
						159.054						86.4585
						404.745
						83.3815						274.272
						141.441						148.221
						121.347						505.156
						593.069						487.168
						1148.15						228.728
						976.21						158.055
						195.014						97.8684
												320.563
						678.399						99.7434
						721.226						303.887
						679.626						99.5473
						208.851						97.3779
						200.87						140.73
						126.335						219.127
						810.037						243.199
						126.148						205.972
						573.068						384.808
						106.637						267.167
						853.351						259.163
						109.954						145.72
						555.167						211.885
						921.141						80.3979
						140.615						96.8668
						106.564						95.2067
						155.382						252.559
						523.019						256.646
						1090.43						394.852
						785.51						60.9336
						1111.18						21.3223
						677.494						614.308
						625.153						120.946
						237						382.724
						146.466						350.699
						194.206						253.022
						137.426						1130.74
						176.564
						125.57						844.508
						175.358						602.335
						114.743						96.4669
						140.499						570.572
						145.47						508.171
						159.042						241.652
						136.889						157.644
						93.9041						629.518
						200.264						236.504
						738.948						303.088
						146.845						401.67
						867.713						171.511
						118.712
						140.201						86.4585
						168.468
						903.153						274.272
						148.255						148.221
						137.075						505.156
						1162.4						487.168
						85.5271						228.728
						91.5027						158.055
						115.863						157.87
						494.474						127.38
						314.218						169.538
						531.233						76.9396
						148.38						598.276
						101.229						75.6488
						460.732						94.0832
						181.927						95.5446
						86.2368						104.147
						108.942						437.892
						633.178						193.677
						443.07						71.5367
						890.798						148.374
						183.492						104.995
						270.341						229.592
						779.898						97.8684
						788.331						320.563
						99.5862						99.7434
						360.85						303.887
						18.5789						99.5473
						347.467						97.3779
						183.878						140.73
						528.009						219.127
						112.233						243.199
						931.341						205.972
						147.433						384.808
						82.8566						267.167
						98.1977						259.163
						87.2555						145.72
						84.7373						211.885
						94.5796						80.3979
						93.0615						96.8668
						94.5706						95.2067
						1266.94						252.559
												256.646
												394.852
						350.237						60.9336
						134.088						21.3223
						848.566						614.308
						947.772						120.946
						909.253						382.724
						102.98						350.699
						610.257						253.022
						616.994						1130.74
						789.376
						1162.29						844.508
						112.602						602.335
						112.848						96.4669
						105.051						570.572
						113.712						508.171
						101.854						241.652
						120.14						157.644
						175.42						629.518
						237.894						236.504
						97.2838						303.088
						111.485						401.67
						159.054						171.511
						404.745
						83.3815						86.4585
						141.441
						121.347						274.272
						593.069						148.221
						1148.15						505.156
						976.21						487.168
						195.014						228.728
												158.055
						678.399						157.87
						721.226						127.38
						679.626						169.538
						208.851						76.9396
						200.87						598.276
						126.335						75.6488
						810.037						94.0832
						126.148						95.5446
						573.068						104.147
						106.637						437.892
						853.351						193.677
						109.954						71.5367
						555.167						148.374
						921.141						104.995
						140.615						229.592
						106.564						201.323
						155.382						90.7161
						523.019						502.025
						1090.43						661.034
						785.51						216.613
						1111.18						532.334
						677.494
						625.153						338.445
						237						166.312
						146.466						178.834
						194.206						138.769
						137.426						131.243
						176.564						136.853
						125.57						88.0496
						175.358						77.8005
						114.743						357.616
						140.499						293.421
						145.47						475.179
						159.042						143.937
						136.889						243.474
						93.9041
						200.264						349.266
						738.948						825.479
						146.845						476.578
						867.713						128.885
						118.712						572.864
						140.201						121.428
						168.468						419.592
						903.153						138.769
						148.255						131.243
						137.075						136.853
						1162.4						88.0496
						85.5271						77.8005
						91.5027						357.616
						115.863						293.421
						494.474						475.179
						314.218						143.937
						531.233						243.474
						148.38
						101.229						349.266
						460.732						825.479
						181.927						476.578
						86.2368						128.885
						108.942						572.864
						633.178						121.428
						443.07						419.592
						890.798						129.15
						183.492						213.077
						270.341						153.933
						779.898						222.364
						788.331						77.1233
						99.5862						601.017
						360.85						297.514
						18.5789						94.6249
						347.467						621.603
						183.878						1474.23
						528.009						773.751
						112.233						1287.1
						931.341						454.693
						147.433						1858.83
						82.8566						159.041
						98.1977						796.015
						87.2555						616.285
						84.7373						671.094
						94.5796						226.552
						93.0615						138.769
						94.5706						131.243
						1266.94						136.853
												88.0496
												77.8005
						350.237						357.616
						134.088						293.421
						848.566						475.179
						947.772						143.937
						909.253						243.474
						102.98
						610.257						349.266
						616.994						825.479
						789.376						476.578
						1162.29						128.885
						112.602						572.864
						112.848						121.428
						269.565						419.592
						200.379						129.15
						192.379						213.077
						84.7682						153.933
						132.33						222.364
						159.708						77.1233
						144.968						601.017
						177.624						297.514
						143.635						94.6249
						145.381						621.603
						137.969						1474.23
						172.25						773.751
						135.094						1287.1
						282.448						454.693
						766.061						1858.83
						405.57						159.041
						118.617						796.015
						659.335						616.285
						150.757						671.094
						2.58909						226.552
						88.4817						374.49
						106.44						130.602
						85.6653						91.3778
						104.763						177.285
						21.6723						480.136
						302.233						110.372
						114.957						667.154
						381.456						861.884
						120.722						487.242
						93.5109						547.457
						12.1995						159.717
						893.105						82.9397
						800.808						131.934
						242.161						839.143
						954.894						463.723
						947.771						560.713
						110.445						340.683
						1434.06						293.329
						575.378						211.163
						1010.96						120.565
						990.17						758.528
						807.771						812.819
						736.552						130.826
						88.4817						588.59
						106.44						177.67
						85.6653						846.847
						104.763						311.491
						21.6723						210.435
						302.233
						114.957						785.153
						381.456						160.149
						120.722						203.896
						93.5109						130.16
						12.1995						138.769
						893.105						131.243
						800.808						136.853
						242.161						88.0496
						954.894						77.8005
						947.771						357.616
						110.445						293.421
						1434.06						475.179
						575.378						143.937
						1010.96						243.474
						990.17
						807.771						349.266
						736.552						825.479
						128.92						476.578
						90.9713						128.885
						76.9366						572.864
						153.179						121.428
						118.573						419.592
						169.489						129.15
						191.413						213.077
						162.691						153.933
						161.433						222.364
						359.445						77.1233
						185.281						601.017
						239.482						297.514
						586.624						94.6249
						145.756						621.603
						588.887						1474.23
						761.649						773.751
						207.139						1287.1
						558.507						454.693
						682.106						1858.83
						174.015						159.041
						552.416						796.015
												616.285
						580.397						671.094
						182.717						226.552
						660.593						374.49
						193.45						130.602
						88.4817						91.3778
						106.44						177.285
						85.6653						480.136
						104.763						110.372
						21.6723						667.154
						302.233						861.884
						114.957						487.242
						381.456						547.457
						120.722						159.717
						93.5109						82.9397
						12.1995						131.934
						893.105						839.143
						800.808						463.723
						242.161						560.713
						954.894						340.683
						947.771						293.329
						110.445						211.163
						1434.06						120.565
						575.378						758.528
						1010.96						812.819
						990.17						130.826
						807.771						588.59
						736.552						177.67
						128.92						846.847
						90.9713						311.491
						76.9366						210.435
						153.179
						118.573						785.153
						169.489						160.149
						191.413						203.896
						162.691						130.16
						161.433						86.7653
						359.445						135.4
						185.281						98.2526
						239.482						467.962
						586.624						436.221
						145.756						648.951
						588.887						133.231
						761.649						402.521
						207.139						693.564
						558.507						176.58
						682.106						138.769
						174.015						131.243
						552.416						136.853
												88.0496
						580.397						77.8005
						182.717						357.616
						660.593						293.421
						193.45						475.179
						144.534						143.937
						81.3268						243.474
						144.587
						159.749						349.266
						102.956						825.479
						166.443						476.578
						108.653						128.885
						139.25						572.864
						101.135						121.428
						143.772						419.592
						481.168						129.15
						84.2399						213.077
						149.265						153.933
						104.939						222.364
						112.168						77.1233
						785.576						601.017
												297.514
						898.396						94.6249
						130.778						621.603
						436.597						1474.23
						96.2413						773.751
						406.338						1287.1
						260.467						454.693
						79.8431						1858.83
						53.1892						159.041
						90.634						796.015
						133.598						616.285
						581.592						671.094
						94.7278						226.552
						433.995						374.49
						179.688						130.602
						92.7716						91.3778
						121.033						177.285
						120.042						480.136
						77.1761						110.372
						88.4817						667.154
						106.44						861.884
						85.6653						487.242
						104.763						547.457
						21.6723						159.717
						302.233						82.9397
						114.957						131.934
						381.456						839.143
						120.722						463.723
						93.5109						560.713
						12.1995						340.683
						893.105						293.329
						800.808						211.163
						242.161						120.565
						954.894						758.528
						947.771						812.819
						110.445						130.826
						1434.06						588.59
						575.378						177.67
						1010.96						846.847
						990.17						311.491
						807.771						210.435
						736.552
						128.92						785.153
						90.9713						160.149
						76.9366						203.896
						153.179						130.16
						118.573						86.7653
						169.489						135.4
						191.413						98.2526
						162.691						467.962
						161.433						436.221
						359.445						648.951
						185.281						133.231
						239.482						402.521
						586.624						693.564
						145.756						176.58
						588.887						397.462
						761.649						107.869
						207.139						113.559
						558.507						120.386
						682.106						129.59
						174.015						97.1518
						552.416						335.662
												94.3208
						580.397						88.0236
						182.717						81.2078
						660.593						121.801
						193.45						135.346
						144.534						309.754
						81.3268						814.838
						144.587						245.297
						159.749						251.693
						102.956						861.595
						166.443						133.868
						108.653						224.897
						139.25						313.163
						101.135						610.205
						143.772						178.166
						481.168						220.078
						84.2399						356.969
						149.265						617.43
						104.939						307.878
						112.168
						785.576
						898.396
						130.778
						436.597
						96.2413
						406.338
						260.467
						79.8431
						53.1892
						90.634
						133.598
						581.592
						94.7278
						433.995
						179.688
						92.7716
						121.033
						120.042
						77.1761
						108.74
						94.2153
						86.3196
						79.8379
						495.734
						76.7836
						85.276
						84.199
						468.316
						441.608
						399.278
						627.068
						321.882
						430.388
						225.179
						393.66
						567.899
						79.1447
						490.983
						88.4817
						106.44
						85.6653
						104.763
						21.6723
						302.233
						114.957
						381.456
						120.722
						93.5109
						12.1995
						893.105
						800.808
						242.161
						954.894
						947.771
						110.445
						1434.06
						575.378
						1010.96
						990.17
						807.771
						736.552
						128.92
						90.9713
						76.9366
						153.179
						118.573
						169.489
						191.413
						162.691
						161.433
						359.445
						185.281
						239.482
						586.624
						145.756
						588.887
						761.649
						207.139
						558.507
						682.106
						174.015
						552.416
						580.397
						182.717
						660.593
						193.45
						144.534
						81.3268
						144.587
						159.749
						102.956
						166.443
						108.653
						139.25
						101.135
						143.772
						481.168
						84.2399
						149.265
						104.939
						112.168
						785.576
						898.396
						130.778
						436.597
						96.2413
						406.338
						260.467
						79.8431
						53.1892
						90.634
						133.598
						581.592
						94.7278
						433.995
						179.688
						92.7716
						121.033
						120.042
						77.1761
						108.74
						94.2153
						86.3196
						79.8379
						495.734
						76.7836
						85.276
						84.199
						468.316
						441.608
						399.278
						627.068
						321.882
						430.388
						225.179
						393.66
						567.899
						79.1447
						490.983
						80.0169
						111.695
						81.4745
						179.93
						97.6846
						757.554
						211.535
						125.533
						108.234
						130.719
						150.871
						134.318
						119.797
						124.322
						117.618
						163.837
						340.141
						131.393
						945.731
						156.624
						74.5344
						988.429
						145.676
						125.218
						114.196
						190.978
						149.821
						166.601
						471.054
						241.724
						301.703
						205.96
						89.1323
						234.353
						350.119
						145.443
						994.75
						199.126
						169.323

## Sheet: Fig. 2C
Rapid in situ forming PEG hydrogels for mucosal drug delivery
Taj Yeruva1*, Robert J. Morris III2, Sahana Kumar1,3, Luke Zhao1, Peter Kofinas2, Gregg A. Duncan1,3*
1Fischell Department of Bioengineering, University of Maryland, College Park, MD 20742, USA
2Department of Chemical & Biomolecular Engineering, University of Maryland, College Park, MD 20742, USA
3Molecular and Cellular Biology Program, University of Maryland, College Park, MD 20742, USA
*Correspondence to: Gregg Duncan, email: gaduncan@umd.edu; Taj Yeruva, email: tyeruva@umd.edu
Figure 2. Physical characterization of rapid in situ forming PEG gels
Equilibrium Swelling Ratio
1% 4-arm PEG-Thiol 10kD 1.5% 4-arm PEG-OPSS 10kD			1% 4-arm PEG-Thiol 20kD 1.5% 4-arm PEG-OPSS 20kD			1% 4-arm PEG-Thiol 10kD 2% 4-arm PEG-OPSS 10kD			1% 4-arm PEG-Thiol 20kD 2% 4-arm PEG-OPSS 20kD			2% 4-arm PEG-Thiol 10kD 2% 4-arm PEG-OPSS 10kD			2% 4-arm PEG-Thiol 20kD 2% 4-arm PEG-OPSS 20kD
28.0615			49.4167			29.6835			35.2857			57.1538			146.769
29.7619			30.25			32.5135			35.3235			30.4833			107.667
29.0484			40.375			34.7797			34.1389			30.5283			55.0526

## Sheet: Fig. 2D
Rapid in situ forming PEG hydrogels for mucosal drug delivery
Taj Yeruva1*, Robert J. Morris III2, Sahana Kumar1,3, Luke Zhao1, Peter Kofinas2, Gregg A. Duncan1,3*
1Fischell Department of Bioengineering, University of Maryland, College Park, MD 20742, USA
2Department of Chemical & Biomolecular Engineering, University of Maryland, College Park, MD 20742, USA
3Molecular and Cellular Biology Program, University of Maryland, College Park, MD 20742, USA
*Correspondence to: Gregg Duncan, email: gaduncan@umd.edu; Taj Yeruva, email: tyeruva@umd.edu
Figure 2. Physical characterization of rapid in situ forming PEG gels
Gel degradation (Percentage Mass Remaining)
Time, days	1% 4-arm PEG-Thiol 10kD 1.5% 4-arm PEG-OPSS 10kD			1% 4-arm PEG-Thiol 20kD 1.5% 4-arm PEG-OPSS 20kD			1% 4-arm PEG-Thiol 10kD 2% 4-arm PEG-OPSS 10kD			1% 4-arm PEG-Thiol 20kD 2% 4-arm PEG-OPSS 20kD			2% 4-arm PEG-Thiol 10kD 2% 4-arm PEG-OPSS 10kD			2% 4-arm PEG-Thiol 20kD 2% 4-arm PEG-OPSS 20kD
0	100	100	100	100	100	100	100	100	100	100	100	100	100	100	100	100	100	100
1	86.34	96.83	92.33	104.654	102.364	103.249	122.03	117.17	121.5	138.182	134.382	136.842	126.37	110.27	103.07	115.848	133.778	122.625
2	86.34	94.58	88.24				111.27	118.42	90.37				135.03	97.84	117.48
3	88.38	89.05	87.53				93.44	104.58	90.97				133.71	95.28	106.03
4	85.32	87.51	87.22	104.762	102.055	98.8832	90.68	101.56	102.54	137.143	131.67	130.702	129.43	93.53	100.1	113.281	134.889	125.187
7	81.55	86.28	84.36	102.273	100.206	94.8223	87.5	90.11	95.03	131.818	129.393	129.386	119.86	88.5	97.75	109.598	129.667	116.542
8	80.84	84.65	81.29				86.07	87.93	89.15				119.14	86.86	94.68
9	79.1	81.27	80.57				84.12	87.1	74.34				116.9	86.65	91.72
11	78.19	81.27	79.96				83.71	86.78	72.62				115.27	86.34	90.59
14	76.66	79.12	79.45	98.1602	98.1501	88.5279	81.35	82.21	72.31	128.052	124.295	125.219	111.41	81.83	86.61	106.362	122.111	115.261
16	75.74	76.87	80.27				81.05	80.65	71.6				105.4	81.72	84.87
22	76.96	76.66	78.63				76.33	75.23	67.34				102.55	78.64	80.88
25				93.29	90.9558	90.4569				125.974	121.367	123.355				106.138	117.222	113.127
30	73.7	71.95	72.09	92.0996	89.1059	87.8173	74.18	71.9	62.78	121.558	118.33	120.943	95.93	78.13	73.21	104.799	114.444	110.459

## Sheet: Fig. 3
Rapid in situ forming PEG hydrogels for mucosal drug delivery
Taj Yeruva1*, Robert J. Morris III2, Sahana Kumar1,3, Luke Zhao1, Peter Kofinas2, Gregg A. Duncan1,3*
1Fischell Department of Bioengineering, University of Maryland, College Park, MD 20742, USA
2Department of Chemical & Biomolecular Engineering, University of Maryland, College Park, MD 20742, USA
3Molecular and Cellular Biology Program, University of Maryland, College Park, MD 20742, USA
*Correspondence to: Gregg Duncan, email: gaduncan@umd.edu; Taj Yeruva, email: tyeruva@umd.edu
Figure 3. Self-healing of rapid in situ forming PEG gels - 2% 4-arm PEG-Thiol 20kD 2% 4-arm PEG-OPSS 20kD
Amplitude Sweep at a frequency of 10 rad/sec
Strain %	Storage modulus (G')	Loss modulus (G")
0.00997	1547.65	31.5434
0.015804	1396.33	130.252
0.025038	1454.03	107.841
0.039681	1463.52	65.6193
0.062855	1466.8	18.7637
0.099596	1419.67	27.8645
0.157837	1452.69	28.2135
0.250101	1456.82	0.475498
0.396326	1462.96	8.95251
0.628089	1476.2	7.57285
0.995403	1485.59	7.97464
1.57754	1495.41	5.50638
2.50015	1504.69	4.35539
3.96257	1513.79	3.10871
6.28008	1521.5	1.96812
9.95298	1531.52	1.51091
15.7745	1540.88	3.29977
25.0012	1549.8	3.43237
39.6249	1558.64	4.6508
62.8198	1560.49	9.48917
99.6213	1536.89	29.7769
158.147	1385.78	122.118
250.764	1136.8	243.242
397.932	710.629	300.855
632.505	387.143	295.642
1004.2	112.88	121.188
Cyclical Time Sweep
Low strain 1%, High strain 200%				Low strain 1%, High strain 500%				Low strain 1%, High strain 1000%
Step time, s	Storage modulus (G')	Loss modulus (G")		Step time, s	Storage modulus (G')	Loss modulus (G")		Step time, s	Storage modulus (G')	Loss modulus (G")
8.2035	1364.64	4.4679		5.69033	1484.3	6.75646		5.69033	2208.85	2.26699
13.8582	1372.08	4.29346		15.7433	1502.42	6.15491		13.2302	2205.5	1.64293
19.513	1383.49	3.9841		21.3983	1514.83	5.77196		18.885	2207.81	1.50154
28.3097	1401.49	3.95278		27.0532	1526.69	5.87039		24.5398	2210.28	1.375
33.9643	1412.66	4.07054		33.3362	1538.75	6.03737		32.0797	2213.06	1.66693
39.6192	1423.13	4.17277		38.991	1550.41	5.41898		38.9912	2215.83	1.53846
45.2742	1433.89	3.81174		44.646	1561.03	5.35494		44.646	2218.15	1.17715
50.9292	1444.16	3.82208		50.3008	1571.63	5.03197		50.301	2220.52	1.88319
56.584	1453.99	3.76763		60.354	1590.03	5.23935		60.354	2224.1	1.68167
62.867	1465.17	3.84898		66.0088	1599.57	4.90883		66.0088	2226.3	2.03091
68.5218	1475	3.92871		71.6638	1609.31	5.55832		74.177	2229.85	1.39107
74.1767	1484.34	3.77931		77.3187	1618.07	5.88972		79.8318	2232.25	1.36435
79.8317	1493.83	3.63145		82.9735	1627.17	4.69172		85.4868	2233.93	1.43619
85.4867	1502.77	3.44192		88.6283	1634.74	5.81999		91.1417	2236.12	1.37715
91.1413	1511.93	3.69006		94.2832	1644.09	4.23618		96.7965	2237.99	1.24084
96.7963	1520.37	3.51594		99.9382	1652.7	5.15161		102.451	2240.21	1.42009
102.451	1529.31	3.37475		105.593	1660.82	4.79741		108.106	2242.22	1.30907
108.106	1537.79	3.32953		111.248	1670.04	4.90697		115.018	2244.62	1.61879
113.761	1546.13	3.40274		120.673	1682.19	4.75641		120.673	2246.84	1.69033
119.416	1554.86	3.43724		127.934	453.645	358.064		126.678	107.164	139.049
125.071	1562.8	3.34098		133.589	478.465	399.378		132.333	42.0753	64.2635
131.076	1426.92	54.7499		140.5	402.445	349.748		142.386	26.4402	37.244
136.73	1385.19	84.2948		146.155	370.152	325.768		148.04	23.9252	32.0678
143.013	1384.69	93.1795		151.81	347.084	296.536		153.695	22.6856	29.8968
148.668	1388.32	99.1385		157.465	316.829	267.924		159.35	22.028	28.2044
154.323	1388.24	107.149		163.12	303.162	258.261		165.005	21.301	26.0776
159.978	1388.89	115.863		168.775	294.875	252.396		170.66	20.6669	24.7499
165.633	1394.77	120.832		174.43	284.089	245.593		176.315	20.1545	23.1309
171.288	1401.5	125.185		180.084	285.085	245.12		181.97	19.7601	22.5691
181.341	1415.23	131.06		185.739	278.269	239.507		187.625	19.5682	22.0647
186.996	1421.97	133.871		191.394	264.466	222.119		193.279	18.88	20.7411
192.651	1429.54	136.442		197.049	240.525	193.963		198.934	18.7646	20.1257
198.305	1436.98	138.654		202.704	227.599	180.265		204.589	18.3933	19.7281
203.96	1444.6	140.805		208.359	220.227	168.963		210.872	17.2459	19.0396
213.385	1457.07	144.116		214.014	215.38	179.755		216.527	16.7834	18.433
219.04	1464.05	146.129		219.669	207.603	173.258		222.182	16.5963	17.9329
224.695	1471.05	148.314		225.324	207.384	170.365		227.837	16.3071	17.3533
230.35	1478.01	150.454		230.978	197.441	157.151		233.492	16.0225	16.7695
236.005	1485.27	152.405		236.633	164.424	98.9524		239.146	15.8695	16.6887
241.66	1491.92	153.875		242.288	150.478	80.0362		244.801	15.5204	16.3867
247.314	1498.99	155.541		248.292	452.841	7.60369		250.805	130.092	3.30064
253.318	1661	2.14434		253.947	460.218	6.97478		256.46	132.897	2.76603
258.973	1668.48	2.59294		259.602	464.737	6.83324		262.743	134.419	2.69843
264.628	1677.04	2.75551		265.257	469.548	6.48006		268.398	134.96	2.56306
270.283	1685.18	2.33577		270.912	471.559	6.46883		274.053	135.453	2.42752
275.938	1692.53	2.62638		276.567	473.943	6.45397		279.708	136.113	2.46055
281.592	1700.02	2.4278		282.222	476.782	5.81729		285.363	136.35	2.48749
287.247	1706.39	2.08814		287.877	478.438	5.77415		291.018	136.879	2.47716
292.902	1712.88	2.44018		293.531	480.277	5.73277		296.673	137.173	2.69367
298.557	1719.48	2.31973		299.186	481.711	5.75481		302.328	137.57	2.67232
304.212	1725.61	2.30952		304.841	483.011	5.54141		307.983	138.031	2.67604
309.867	1732.18	2.53852		310.496	484.699	5.36299		313.637	138.354	2.41768
315.522	1737.62	2.32115		316.779	486.256	5.30384		319.292	138.269	2.31545
321.805	1744.62	2.34276		322.434	487.468	5.20771		324.947	138.638	2.31771
327.46	1750.73	2.45201		328.089	489.073	5.39159		330.602	138.941	2.50688
333.115	1756.56	2.50505		333.744	490.038	5.1456		336.257	139.089	2.32765
338.77	1762.35	2.12219		339.399	491.04	4.99681		341.912	139.365	2.36497
344.425	1768.12	2.02696		345.053	492.208	5.13519		347.566	139.547	2.22583
350.079	1773.79	2.21658		350.708	493.159	4.96658		353.221	139.642	2.11086
355.734	1779.22	1.32597		356.363	493.987	4.65297		358.876	139.849	2.35108
361.389	1784.88	2.44408		362.018	494.745	4.99193		364.531	139.588	2.79138
367.044	1789.85	2.2618		367.673	496.009	4.96366		370.186	140.33	2.42539
376.469	1799.36	2.53419		373.678	120.614	56.0143		377.447	13.0798	12.6656
382.474	1594.09	161.656		379.332	129.76	70.9498		383.102	13.7892	13.0457
388.128	1607.79	174.798		384.987	137.801	72.4778		388.757	14.0271	13.155
394.412	1619.92	181.754		390.642	139.411	71.2909		394.412	14.115	13.0014
400.067	1628.4	185.717		396.297	144.109	76.6191		400.067	14.1	12.8329
405.721	1636.01	188.2		401.952	144.73	74.7575		405.721	14.1888	12.7804
411.376	1644.08	190.381		407.607	143.779	72.7719		411.376	14.2647	12.7678
417.031	1648.68	191.937		413.262	145.731	72.9781		417.031	14.2758	12.7768
422.686	1656.21	193.813		418.916	150.367	75.5078		422.686	14.049	12.5613
428.341	1659.6	195.078		424.571	146.831	73.2137		428.341	13.8909	12.2359
433.996	1665.12	196.425		430.226	145.757	72.1244		433.996	13.627	11.9355
439.651	1672.43	197.995		435.881	145.598	71.6749		439.651	13.2008	11.5343
445.305	1677.42	199.356		442.164	146.819	72.7578		445.305	13.0406	11.1926
450.96	1679.94	200.512		447.819	145.774	71.569		450.96	13.0723	11.1737
456.615	1687.06	202.06		453.474	144.919	70.162		456.615	12.9244	11.008
462.27	1689.48	203.043		459.129	144.923	71.0015		462.27	12.8205	10.8639
467.925	1694.22	204.275		464.784	145.887	71.0649		467.925	12.8211	10.6406
473.58	1698.89	205.353		470.438	146.287	68.8576		473.58	12.7538	10.5908
479.235	1703.08	206.297		476.093	147.479	70.7364		479.235	12.7279	10.4929
484.89	1707.19	207.218		481.748	147.442	72.3907		484.89	12.6684	10.4408
491.173	1712.08	208.002		487.403	146.52	72.6481		490.545	12.4276	10.3399
496.828	1716.34	208.832		493.058	147.261	71.5445		496.55	78.7961	1.33562
502.832	1896.76	0.683366		499.062	422.165	7.09049		502.204	80.1927	1.26783
508.487	1901.43	1.31827		504.717	427.02	6.03094		508.488	80.5445	1.25912
514.142	1907.73	1.49431		510.372	429.438	5.61588		514.142	80.7507	1.35315
519.797	1913.72	1.34524		516.027	430.769	5.64352		519.797	81.2895	1.00606
525.452	1918.95	1.31598		521.682	431.889	5.13263		525.452	81.7379	0.985305
531.106	1923.67	1.13035		527.337	432.988	4.93138		531.107	82.5958	1.23256
536.761	1928.51	1.47415		532.992	433.482	4.77611		536.762	83.7267	1.48793
542.416	1932.97	1.51389		538.646	434.417	4.74425		542.417	83.4275	0.716788
548.071	1937.61	1.37428		544.301	435.458	4.76335		548.072	83.4257	0.872335
553.726	1942.08	1.29356		549.956	437.078	4.736		553.726	82.8172	1.12257
559.381	1946.13	1.51065		555.611	437.68	4.6471		559.381	83.9954	1.24468
565.036	1950.4	1.2154		561.266	438.523	4.52747		565.036	84.3859	0.748359
571.319	1955.03	1.47797		567.549	439.656	4.3609		570.691	83.8223	0.518932
576.974	1959.33	1.50679		573.204	439.961	4.40409		576.346	84.7331	1.22657
582.629	1963.29	1.65562		578.859	440.654	4.20194		582.001	85.1228	1.14719
588.284	1967.34	1.54036		584.514	441.319	4.30631		587.656	85.6789	0.936403
593.938	1971.53	1.48883		590.169	442.516	4.1917		593.311	85.3846	1.24473
599.593	1975.38	1.20165		595.823	443.208	4.38605		598.965	85.6424	1.23676
605.248	1979.26	1.6086		601.478	443.629	4.10306		604.62	85.7275	1.37339
610.903	1982.92	1.85081		607.133	444.647	4.32496		610.275	86.0553	1.10712
616.558	1986.6	1.37176		612.788	445.331	4.02016		616.28	10.2448	6.81798
622.213	1990.62	1.5617		618.443	446.055	3.81468		621.934	10.8934	7.77388
628.218	1743.35	213.652		624.447	116.164	48.7407		627.589	11.2387	8.23606
633.872	1770.67	225.955		630.102	121.437	52.9787		633.244	11.4243	8.41133
640.156	1782.59	230.341		636.385	126.125	57.0688		638.899	11.5037	8.49257
645.811	1787.17	232.549		644.554	130.083	59.5859		644.554	11.5283	8.57124
651.466	1792.64	234.259		650.208	131.35	60.9683		650.209	11.6441	8.61743
657.12	1799.86	236.076		655.863	133.801	63.1517		655.864	11.5807	8.64539
662.775	1801.52	237.172		661.518	135.927	64.7453		661.519	11.5309	8.66648
668.43	1805.63	238.398		667.173	137.526	66.0243		667.173	11.6543	8.81043
674.085	1808.99	239.558		673.456	139.902	67.7491		672.828	11.5251	8.68089
679.74	1812.78	240.662		679.111	142.189	69.9145		678.483	11.4394	8.65418
685.395	1816.3	241.92		684.766	145.226	67.9757		684.766	11.3997	8.58973
691.049	1818.44	242.634		690.421	146.093	67.1557		690.421	11.3553	8.55749
696.704	1818.05	243.853		696.076	147.314	67.7379		696.076	11.3333	8.53514
702.359	1818.9	245.085		701.731	146.941	67.755		701.731	11.3011	8.57222
708.014	1819.51	246.2		707.385	147.769	68.0971		707.386	11.3298	8.52098
716.182	1822.73	249.117		713.04	146.084	67.9952		713.041	11.3084	8.49333
721.837	1822.19	250.344		718.695	146.259	68.4341		718.696	11.2537	8.44715
727.492	1826.25	251.827		724.35	147.395	69.6869		724.35	11.2735	8.44655
733.147	1827.89	253.049		730.005	147.379	68.4669		730.005	11.2963	8.45642
738.802	1827.28	253.847		735.66	148.036	68.627		735.66	11.3402	8.45131
744.457	1829.76	254.989		741.315	148.305	68.2092		741.665	79.721	1.4015
750.462	2057.88	-0.3333		747.32	437.246	6.3778		747.319	80.5647	1.60685
756.745	2060.61	1.08093		752.975	443.906	5.9578		752.974	81.0034	1.00987
762.399	2065.84	0.883421		758.629	445.396	6.25476		758.629	81.2228	1.21673
768.054	2070.2	1.02901		764.284	446.131	5.35533		764.284	81.4697	0.876562
773.709	2074.36	0.94045		769.939	447.536	5.03766		769.939	81.3907	0.924025
779.364	2077.98	0.71128		775.594	447.721	4.89747		775.594	81.4222	0.919447
785.019	2081.65	1.04804		781.249	448.991	4.47492		781.249	81.6496	1.1063
790.674	2085.11	0.997429		786.904	450.114	4.47623		786.904	81.6132	0.878981
796.329	2088.47	1.11293		792.558	450.261	5.06223		792.558	81.9548	1.14587
801.984	2091.82	0.761964		798.213	451.163	4.8082		798.213	81.9444	0.942545
807.639	2095.27	0.855546		803.868	452.306	4.3909		803.868	82.0796	0.912443
813.293	2098.43	0.737137		809.523	453.017	3.99722		810.151	81.937	0.970049
818.948	2101.5	0.865604		815.806	454.925	4.57897		815.806	82.3117	0.814305
824.603	2104.68	1.24636		821.461	456.064	5.14718		821.461	81.6665	1.36419
830.258	2107.74	0.968677		827.116	456.658	4.34407		827.116	83.0343	1.03249
835.913	2110.53	1.16687		832.771	457.681	4.08391		832.771	83.3476	0.645765
841.568	2113.84	1.24054		838.426	458.481	3.71019		838.426	83.4178	0.806262
851.621	2118.92	0.830597		844.081	459.305	4.00001		844.081	83.3383	0.847606
857.276	2121.57	0.67464		849.736	460.347	3.9571		849.735	83.4718	0.916609
862.93	2124.5	1.32332		855.39	461.728	3.96977		855.39	83.709	0.758973
868.585	2127.27	0.910356		861.045	462.617	3.76953		861.045	83.7557	0.886289
				866.7	463.197	3.8749

## Sheet: Fig. 4
Rapid in situ forming PEG hydrogels for mucosal drug delivery
Taj Yeruva1*, Robert J. Morris III2, Sahana Kumar1,3, Luke Zhao1, Peter Kofinas2, Gregg A. Duncan1,3*
1Fischell Department of Bioengineering, University of Maryland, College Park, MD 20742, USA
2Department of Chemical & Biomolecular Engineering, University of Maryland, College Park, MD 20742, USA
3Molecular and Cellular Biology Program, University of Maryland, College Park, MD 20742, USA
*Correspondence to: Gregg Duncan, email: gaduncan@umd.edu; Taj Yeruva, email: tyeruva@umd.edu
Figure 4. Mucoadhesive properties of rapid in situ forming PEG hydrogels.
Mucoadhesion Strength, Pa
	1% 4-arm PEG-Thiol 10kD 1.5% 4-arm PEG-OPSS 10kD			1% 4-arm PEG-Thiol 20kD 1.5% 4-arm PEG-OPSS 20kD			1% 4-arm PEG-Thiol 10kD 2% 4-arm PEG-OPSS 10kD			1% 4-arm PEG-Thiol 20kD 2% 4-arm PEG-OPSS 20kD			2% 4-arm PEG-Thiol 10kD 2% 4-arm PEG-OPSS 10kD			2% 4-arm PEG-Thiol 20kD 2% 4-arm PEG-OPSS 20kD			4% Chitosan			2% 4-arm PEG-DBCO 10kD 2% 4-arm PEG-Azide 10kD
0 hr	738.132			978.663			926.64			966.766			560.684			1252.56			1128.68			757.502
	1295.18			1141.47			565.58			935.852			461.462			600.577			1937.04			762.752
	589.089			879.04			966.06			876.462			1139.73			1150.07			1736.47			701.217
24 hr	685.471			662.434			984.481			872.025			964.615			618.958			2428.81			1406.97
	686.332			956.703			1473.99			527.511			1205.47			707.519			2579.15			1014.86
	1123.73			973.293			497.966			876.003			699.22			688.454			1274.77			770.187

## Sheet: Fig. 5
Rapid in situ forming PEG hydrogels for mucosal drug delivery
Taj Yeruva1*, Robert J. Morris III2, Sahana Kumar1,3, Luke Zhao1, Peter Kofinas2, Gregg A. Duncan1,3*
1Fischell Department of Bioengineering, University of Maryland, College Park, MD 20742, USA
2Department of Chemical & Biomolecular Engineering, University of Maryland, College Park, MD 20742, USA
3Molecular and Cellular Biology Program, University of Maryland, College Park, MD 20742, USA
*Correspondence to: Gregg Duncan, email: gaduncan@umd.edu; Taj Yeruva, email: tyeruva@umd.edu
Figure 5. Release kinetics of model therapeutic cargo from rapid forming PEG hydrogels.
Cumulative weight percentage released from 1% w/v 4-arm PEG-SH and 1.5% w/v 4-arm PEG-OPSS
Time, hr	BSA 10kD			BSA 20kD			IgG 10kD			IgG 20kD			40nm NPs 10kD			40nm NPs 20kD
0	0	0	0	0	0	0	0	0	0	0	0	0	0	0	0	0	0	0
0.25	41.0481	40.1016	38.036	44.391	46.5945	47.7727	22.4302	20.128	25.2036	18.8912	18.6095	24.3841	4.31362	2.74287	1.52851	5.61246	0.382788	1.9905
0.5	57.0128	59.4501	62.2782	62.6684	64.999	70.447	34.3713	30.8681	35.8438	29.6978	29.6594	35.4392	4.83369	3.18638	1.71331	6.55755	0.755016	2.11457
1	72.8435	78.4576	79.8601	79.5013	82.1001	87.3813	46.7222	42.4328	47.283	40.3227	41.7234	47.3956	5.11616	3.50317	1.8981	7.41288	0.857973	2.23337
3	90.5078	95.503	99.7452	97.8919	98.49	102.823	69.2574	64.5685	66.5352	60.9219	63.6517	66.6274	5.33791	3.79356	2.45248	8.57181	1.26452	2.37328
7	97.0282	102.819	107.178	107.743	110.904	109.454	91.0807	86.2074	83.0269	76.758	83.4571	82.402	5.45671	3.84636	2.50792	9.58817	1.55227	2.25977
24	100.353	107.662	111.962	113.447	116.39	112.923	118.927	116.446	101.624	98.6274	107.616	108.571	5.48046	3.8754	2.42872	9.71753	1.77402	2.26241

## Sheet: Fig. 6A
Rapid in situ forming PEG hydrogels for mucosal drug delivery
Taj Yeruva1*, Robert J. Morris III2, Sahana Kumar1,3, Luke Zhao1, Peter Kofinas2, Gregg A. Duncan1,3*
1Fischell Department of Bioengineering, University of Maryland, College Park, MD 20742, USA
2Department of Chemical & Biomolecular Engineering, University of Maryland, College Park, MD 20742, USA
3Molecular and Cellular Biology Program, University of Maryland, College Park, MD 20742, USA
*Correspondence to: Gregg Duncan, email: gaduncan@umd.edu; Taj Yeruva, email: tyeruva@umd.edu
Figure 6. Biocompatibility of rapid forming PEG gels.
Percentage cell viability post treatment with gels
Control			1% 4-arm PEG-Thiol 10kD 1.5% 4-arm PEG-OPSS 10kD			1% 4-arm PEG-Thiol 20kD 1.5% 4-arm PEG-OPSS 20kD			1% 4-arm PEG-Thiol 10kD 2% 4-arm PEG-OPSS 10kD			1% 4-arm PEG-Thiol 20kD 2% 4-arm PEG-OPSS 20kD			2% 4-arm PEG-Thiol 10kD 2% 4-arm PEG-OPSS 10kD			2% 4-arm PEG-Thiol 20kD 2% 4-arm PEG-OPSS 20kD
99.871			103.71			96.0547			100.622			109.962			89.3151			110.262
102.054			87.4438			100.914			106.106			105.624			92.6665			95.9866
106.412			95.0084			85.3145			83.2334			94.3903			91.6599			93.9339
91.6628			110.628			87.4013			111.017			107.665			110.889			104.711

## Sheet: Fig. 6B
Rapid in situ forming PEG hydrogels for mucosal drug delivery
Taj Yeruva1*, Robert J. Morris III2, Sahana Kumar1,3, Luke Zhao1, Peter Kofinas2, Gregg A. Duncan1,3*
1Fischell Department of Bioengineering, University of Maryland, College Park, MD 20742, USA
2Department of Chemical & Biomolecular Engineering, University of Maryland, College Park, MD 20742, USA
3Molecular and Cellular Biology Program, University of Maryland, College Park, MD 20742, USA
*Correspondence to: Gregg Duncan, email: gaduncan@umd.edu; Taj Yeruva, email: tyeruva@umd.edu
Figure 6. Biocompatibility of rapid forming PEG gels.
Percentage cell viability post treatment with polymer solutions
Control	1% 4-arm PEG-SH 10kD	1%4-arm PEG-SH 20kD	2%4-arm PEG-SH 10kD	2%4-arm PEG-SH 20kD	4%4-arm PEG-SH 10kD	4%4-arm PEG-SH 20kD	1% 4-arm PEG-OPSS 10kD	1% 4-arm PEG-OPSS 20kD	2% 4-arm PEG-OPSS 10kD	2% 4-arm PEG-OPSS 20kD	4% 4-arm PEG-OPSS 10kD	4% 4-arm PEG-OPSS 20kD
100.675	89.8415	95.2562	103.176	97.8621	92.048	88.4507	85.5708	88.6536	72.4994	93.4116	14.0251	89.1179
102.526	100.648	101.748	101.411	93.855	97.8496	93.8717	84.3285	92.5395	80.7459	96.4483	10.8984	94.8254
99.5646	97.4292	99.7674	99.6064	94.7292	97.1615	85.3178	93.2631	94.6058	85.3972	99.5144	9.70632	94.5284
97.2033	98.7134	100.261	98.8911	91.5377	97.7743	92.6064	91.3683	91.9099	84.8806	100.129	8.73172	93.2924
100.031	94.6455	99.9076	99.8385	90.5505	100.305	89.3375	94.6392	85.964	81.1433	99.7779	5.38543	89.5027

## Sheet: Fig. 7
Rapid in situ forming PEG hydrogels for mucosal drug delivery
Taj Yeruva1*, Robert J. Morris III2, Sahana Kumar1,3, Luke Zhao1, Peter Kofinas2, Gregg A. Duncan1,3*
1Fischell Department of Bioengineering, University of Maryland, College Park, MD 20742, USA
2Department of Chemical & Biomolecular Engineering, University of Maryland, College Park, MD 20742, USA
3Molecular and Cellular Biology Program, University of Maryland, College Park, MD 20742, USA
*Correspondence to: Gregg Duncan, email: gaduncan@umd.edu; Taj Yeruva, email: tyeruva@umd.edu
Figure 7. In vivo nasal retention of rapid forming PEG gels.
Total Radiation Efficiency [p/s] / [µW/cm²]
Time, Hours	PBS			Gel
0	1330000000	1090000000	818000000	1220000000	967000000	244000000
2	714000000	495000000	334000000	721000000	743000000	352000000
5	532000000	321000000	262000000	894000000	895000000	373000000
48	101000000	97000000	93100000	888000000	874000000	411000000
168	83200000	87200000	84300000	488000000	246000000	78300000
360	94000000	75600000	83600000	168000000	72700000	78900000
Body Weight (g)
Days	Control	PBS			Gel
0	18	15.5	18	18.5	17.5	17.5	17
1	18	15.5	18	18.5	17	17	16.5
3	18.5	15.5	18.5	19.5	17.5	18	17.5
6	18.5	15	18.5	18.5	17.5	17.5	15.5
7	18.5	15.5	19	19	18	18	16
8	18.5	15.5	19	19	18.5	18	15.5
11	19	16	18	19	17.5	17.5	16
15	19.5	16.5	19.5	19.5	19	18	17.5
